# Supplementary material for: A two-stage assembly with PEI induced emission enhancement of Au–AgNCs@AMP and the intrinsic mechanism
Source: Royal Society of Chemistry journal article supplement (doi:10.1039/c8nr03720e), 2018-01-01
Supplement: c8nr03720e1.pdf [file c8nr03720e1.pdf]

(Supporting Information)

**Two-stage Assembly with PEI Induced Emission Enhancement of Au-AgNCs@AMP and the Intrinsic Mechanism**

Xu Yu,<sup>‡a</sup> Jiao Liu,<sup>‡b</sup> Hong-Wei Li<sup>\*a</sup> and Yuqing Wu<sup>a</sup>

<sup>a</sup>State Key Laboratory of Supramolecular Structure and Materials, Institute of Theoretical Chemistry, Jilin University, No.2699 Qianjin Street, Changchun 130012, China. E-mail: [lihongwei@jlu.edu.cn](mailto:lihongwei@jlu.edu.cn).

<sup>b</sup>College of Chemistry and Chemical Engineering, Qiqihar University, Qiqihar 161006, China.

<sup>‡</sup>These authors contributed equally to this work.

**Experimental Section**

*Materials and Reagents:* Adenosine 5'-monophosphate (AMP,  $\geq 99\%$ ) was purchased from TCI (Shanghai) Development Co., Ltd. (China). Polyethyleneimines (PEI, Mw = 10000) and 2-4-(2-Hydroxyethyl)-1-piperazine ethanesulfonic acid (HEPES) were purchased from Aladdin Reagent Co., Ltd. (Shanghai, China). HAuCl<sub>4</sub>·3H<sub>2</sub>O, AgNO<sub>3</sub>, sodium citrate, NaH<sub>2</sub>PO<sub>4</sub> and Na<sub>2</sub>HPO<sub>4</sub> were bought from Beijing Chemical Factory (China) and the purities of them were higher than 99% either. Distill water ( $\rho = 18.2 \text{ M}\Omega \cdot \text{cm}$ , 25 °C) was obtained from a Millipore Milli-Q water purification system. The stock solution of AMP (20 mM) was prepared with distill water and stored in dark at 4 °C. And HEPES-NaOH buffer solution (20 mM, pH=7.4) was prepared with 20 mM HEPES and NaOH in aqueous solution.

*Preparation of Au-AgNCs@AMP:* The Au-AgNCs@AMP were prepared by following previously reported protocol.<sup>S1</sup>

*The assembly of Au-AgNCs@AMP and PEI:* 1.0 mL stored solution of Au-AgNCs@AMP (1.0 mM) was diluted with HEPES-NaOH buffer solution (20 mM, pH=7.4) to 20.0 mL and then was divided into 20 parts and removed to EP tubes. The samples were titrated with different amount of PEI and mixed well, respectively. Then the luminescence and Uv-vis absorption spectra were measured to monitor the changes in the process.

*Luminescence detections:* Luminescence spectra were recorded on a Shimadzu (Japan) RF-5301PC

spectrophotometer. To reduce the fluctuation of excitation intensity during measurement, the lamp was kept on for 0.5 h before the measurement. All spectroscopic measurements were performed in 20.0 mM HEPES-NaOH (pH = 7.4), except for detection in the phosphate buffer solution, and an excitation wavelength at 325 nm was fixed.

*Time-resolved fluorescence spectra:* Life-times were obtained from the luminescent decay curves recorded by using a time-correlated single photon counting technique with an Edinburgh Analytical Instruments-FLS920. To obtain the luminescent decay curve, the excitation wavelength was fixed at 375 nm for Au-AgNCs@AMP, and the intensity at 490 was collected. Each experiment was repeated three times to obtain more reliable life-times, and the presented result is one selected as a representative. The lifetimes and percentage of them were calculated by exponentially fitting the decay curve with the software including in the Instruments.

*UV-vis absorption spectra:* The Uv-vis absorption spectra were recorded on a Shimadzu UV-3600 spectrophotometer, and all measurements were performed in 0.2 cm × 1.0 cm quartz cuvettes (1.0 mL volume).

*Transmission electron microscopy (TEM):* TEM images were performed to observe the constitutive nanocrystals of Au-AgNCs by using JEM-2200FS (Jeol Ltd. Japan) at an accelerating voltage of 200 kV. For allowing TEM observations, the sample was suspended in aqueous solution under ultrasonic treatment prior to direct deposition on a copper grid and air-drying.

*Field Emission Scanning Electron Microscope (SEM):* The morphology of the assembly was characterized using a JEOL JSM-6700F field emission scanning electron microscope (FE-SEM) operating at 3.0 kV.

*Fourier transform infrared (FT-IR) spectra:* All infrared absorption spectra were characterized by using a Vertex 80V vacuum FT-IR spectrometer (Bruker). A pellet is prepared by using ~2 mg of dried sample powder and about 300 mg potassium bromide through a hydraulic pressure. For each spectrum, 64 scans between 4000 and 400  $\text{cm}^{-1}$  are recorded, in a resolution of 4  $\text{cm}^{-1}$ .

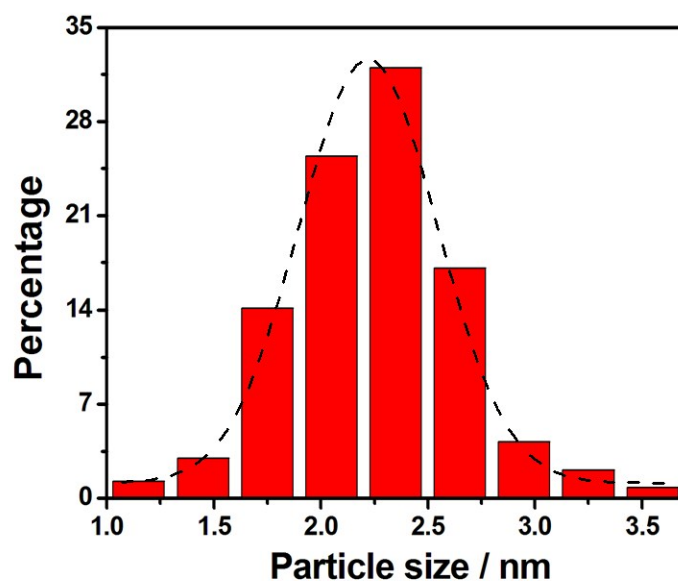

Fig. S1 The size distributions of Au-AgNCs@AMP alone.

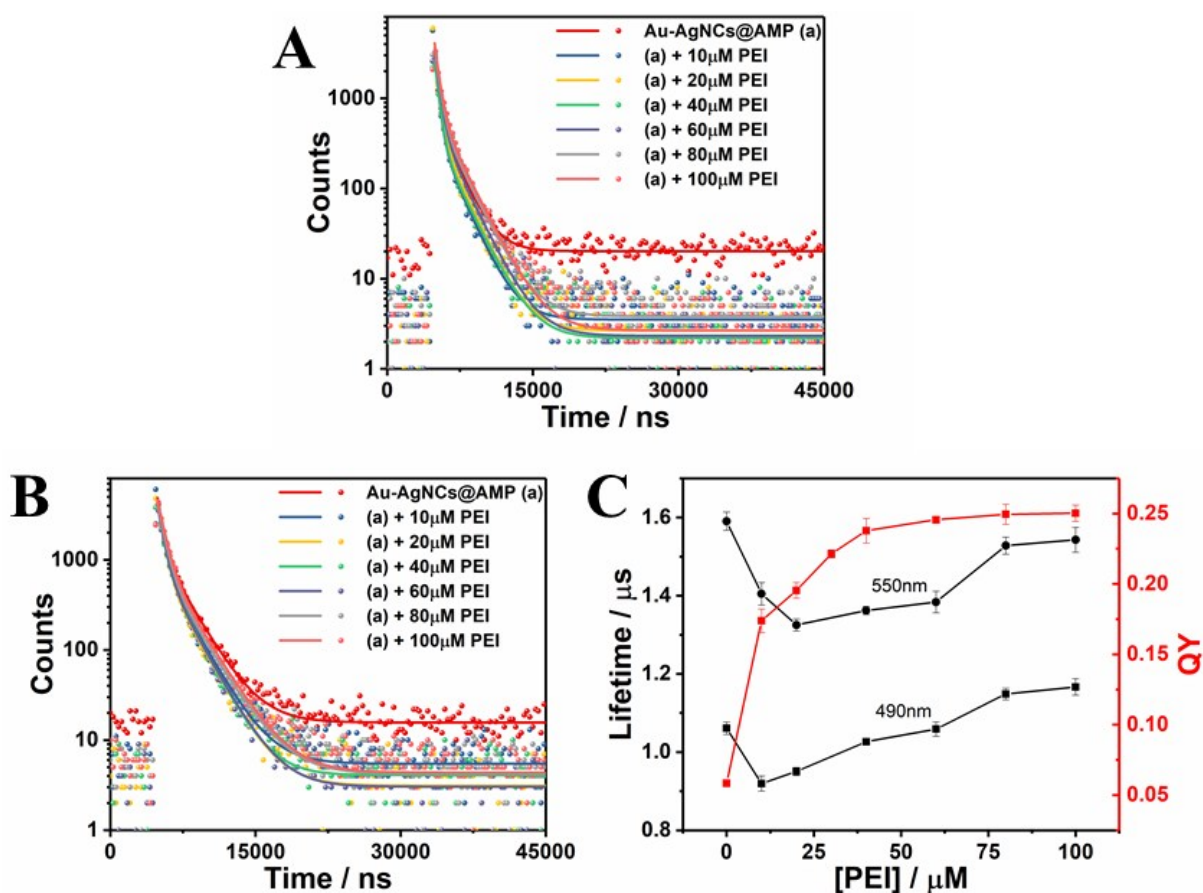

Fig. S2 The time-resolved luminescence spectra of Au-AgNCs@AMP before and after adding different amount of PEI (10.0 – 100  $\mu\text{M}$ ) at 490 nm (A) and 550 nm (B) respectively; (C) Average lifetime and luminescence QY changes of Au-AgNCs@AMP upon adding different amount of PEI (0 – 100  $\mu\text{M}$ ).

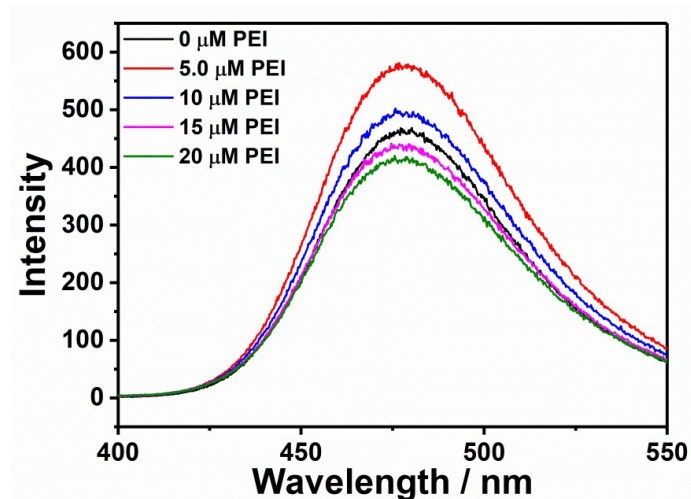

**Fig. S3** Luminescence spectra of AuNCs@AMP (50  $\mu\text{M}$ ) in the presence of different amount of PEI (0, 5.0, 10, 15, 20  $\mu\text{M}$ ).

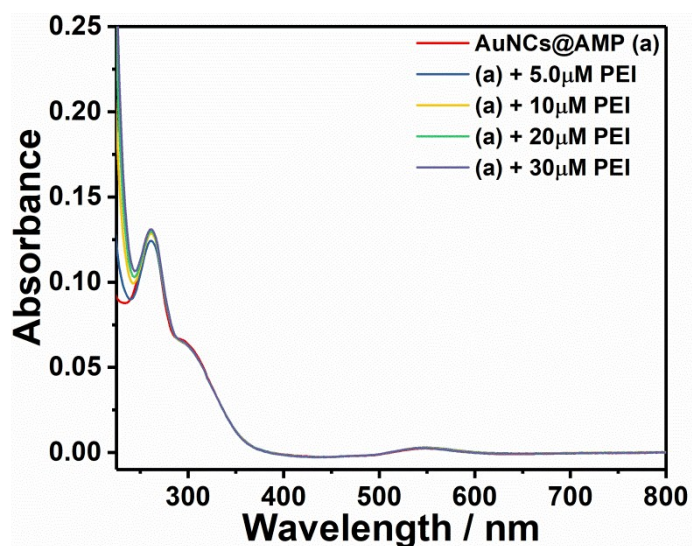

**Fig. S4** Uv-vis absorption spectra of AuNCs@AMP (50  $\mu\text{M}$ ) in the presence of different amount of PEI (0, 5.0, 10, 15, 20  $\mu\text{M}$ ).

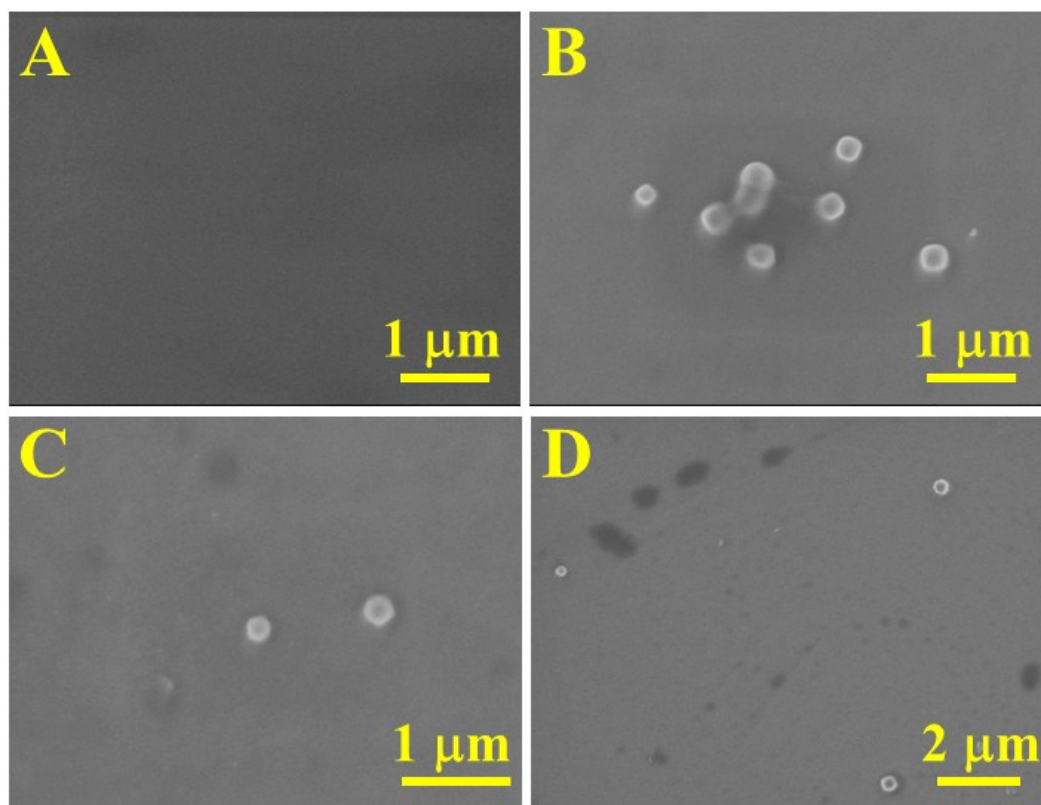

**Fig. S5** Typical SEM images of AuNCs@AMP (50  $\mu\text{M}$ ) in the absence (A) and presence of (B) 10, (C) 20  $\mu\text{M}$  and (D) 30  $\mu\text{M}$  PEI, respectively.

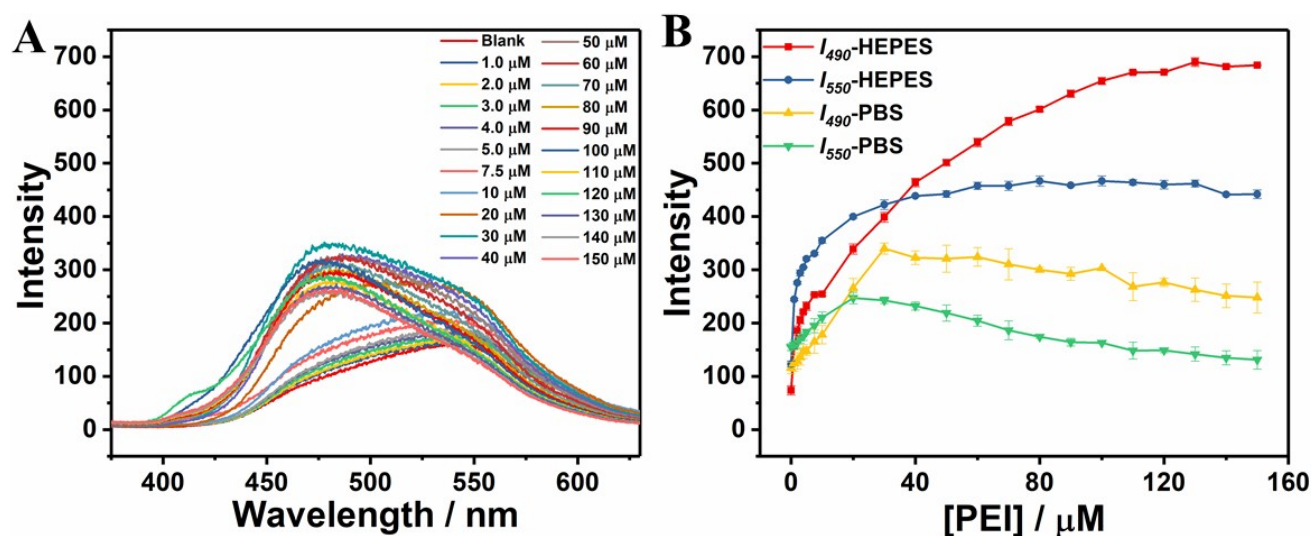

**Fig. S6** A) The fluorescence spectra of Au-AgNCs@AMP (50  $\mu\text{M}$ ) in absence and presence of different amounts of PEI (1.0–150  $\mu\text{M}$ ) in the PBS buffer solution (pH = 7.4,  $\lambda_{\text{ex}}$  = 325 nm); B) The plot of the corresponding fluorescence intensities and the corresponding result in HEPES-NaOH buffers upon the addition of PEI.

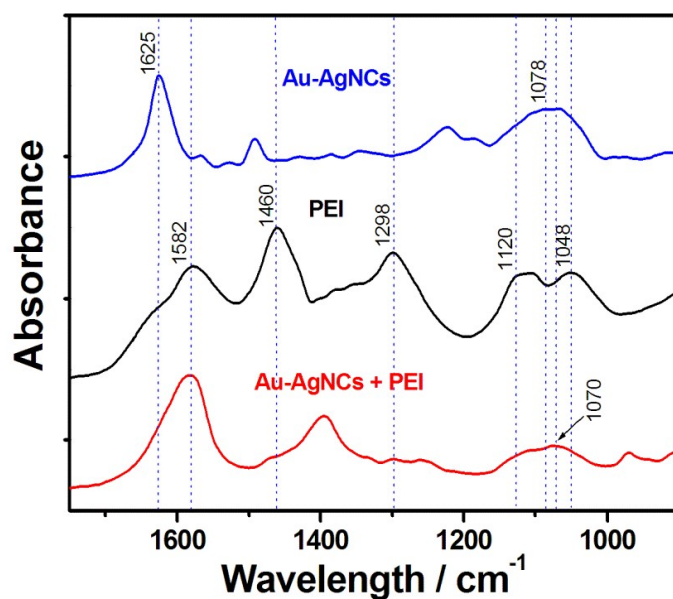

**Fig. S7** FT-IR spectra of Au-AgNCs@AMP, PEI and the assembly of them.

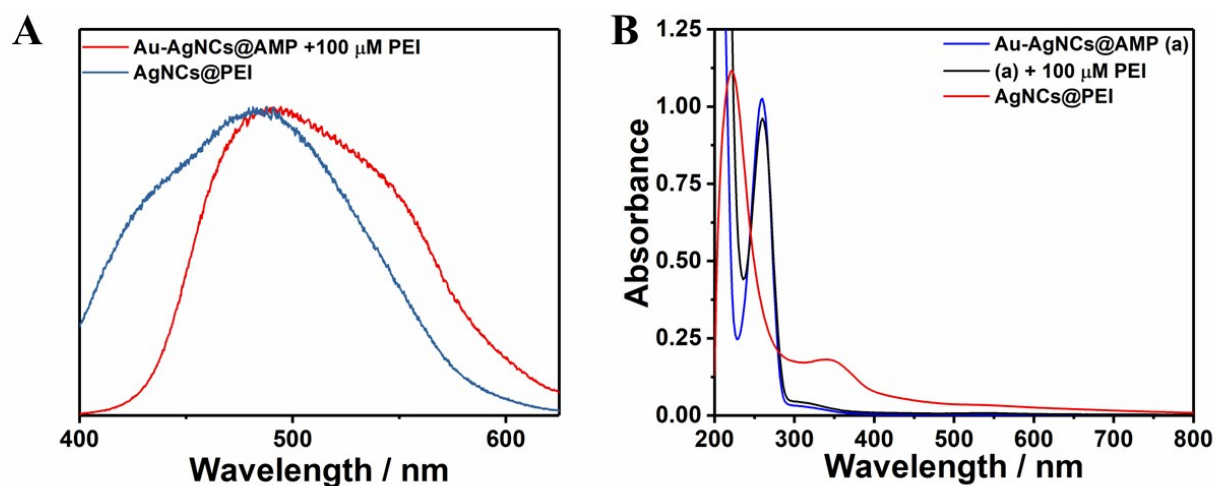

**Fig. S8** A) The fluorescence spectra of AgNCs@PEI (50 μM) and the assembly of Au-AgNCs and PEI in the HEPES-NaOH buffer solution (pH = 7.4,  $\lambda_{\text{ex}} = 325$  nm); B) the UV-vis absorption spectra of Au-AgNCs@AMP (50 μM) in the absence and presence of PEI (100 μM) and AgNCs@PEI (50 μM) in HEPES-NaOH buffer solution.

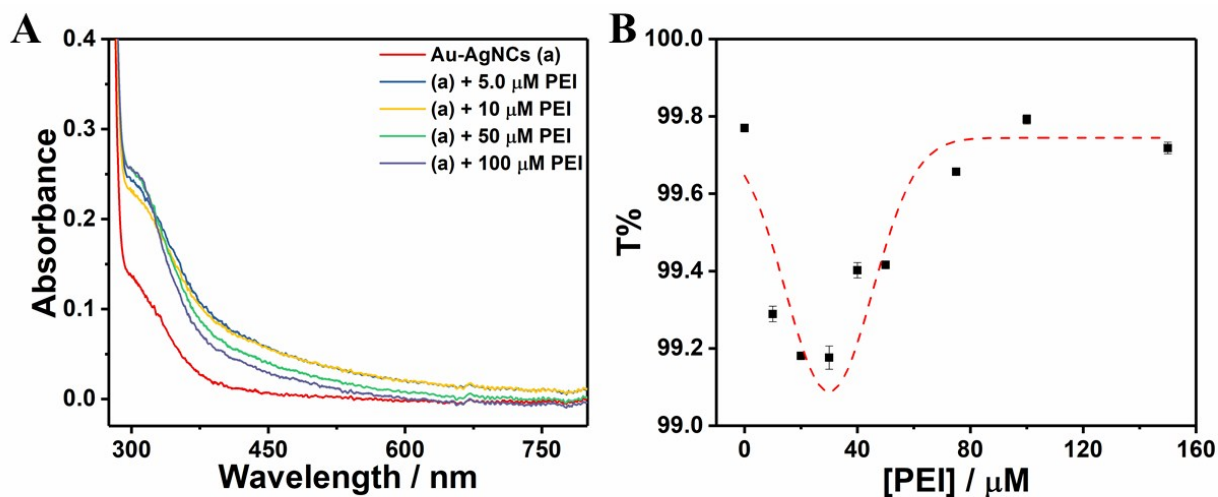

**Fig. S9** (A) UV-vis absorption spectra of Au-AgNCs@AMP (50  $\mu\text{M}$ ) in the absence and presence of different amount PEI; (B) Transmission changes of Au-AgNCs@AMP in titrating with different amount of PEI.

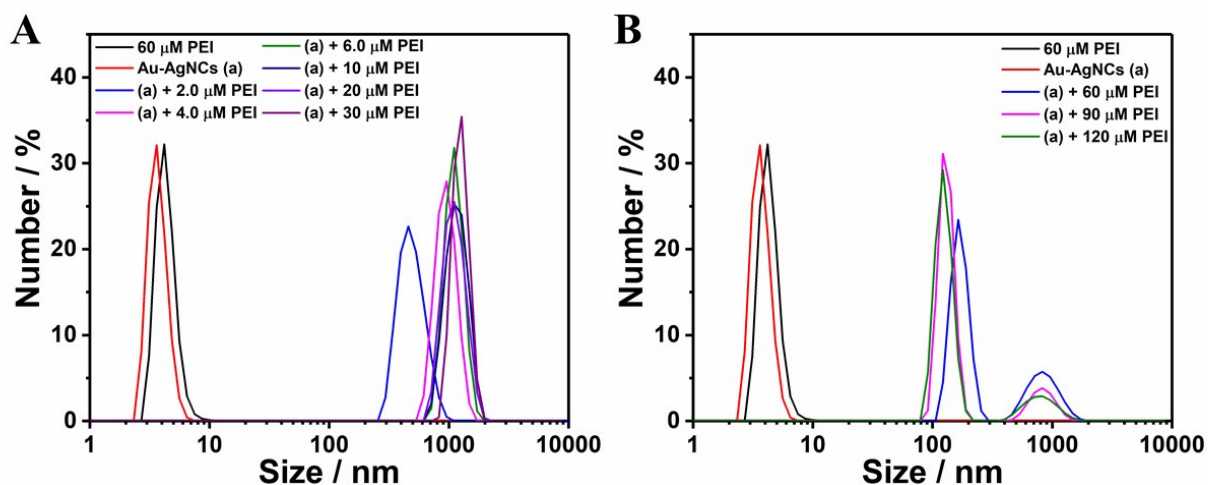

**Fig. S10** DLS measurement of Au-AgNCs@AMP (50  $\mu\text{M}$ ), PEI (60  $\mu\text{M}$ ) and the assembly of Au-AgNCs@AMP (50  $\mu\text{M}$ ) and different amount of PEI in HEPES-NaOH buffer solution, where in the presence of (A) 2.0, 4.0, 6.0, 10.0, 20.0, 30.0  $\mu\text{M}$  PEI and (B) 60.0, 90.0, 120  $\mu\text{M}$  PEI in the system.

**Table S1** The life-times and percentages changes of Au-AgNCs@AMP at 490 nm and 550 nm, respectively, in the absence and presence of different amount of PEI.

| [PEI] /<br>$\mu\text{M}$ | $I_{490\text{ nm}}$    |         |                        |         |                                       | $I_{550\text{ nm}}$    |         |                        |         |                                       |
|--------------------------|------------------------|---------|------------------------|---------|---------------------------------------|------------------------|---------|------------------------|---------|---------------------------------------|
|                          | $\tau_1 / \mu\text{s}$ | Rel / % | $\tau_2 / \mu\text{s}$ | Rel / % | $\tau_{\text{Average}} / \mu\text{s}$ | $\tau_1 / \mu\text{s}$ | Rel / % | $\tau_2 / \mu\text{s}$ | Rel / % | $\tau_{\text{Average}} / \mu\text{s}$ |
| 0                        | 0.292                  | 40.71   | 1.589                  | 59.29   | 1.061                                 | 0.500                  | 39.08   | 2.290                  | 60.92   | 1.590                                 |
| 10                       | 0.362                  | 59.10   | 1.725                  | 40.90   | 0.919                                 | 0.568                  | 49.62   | 2.228                  | 50.38   | 1.405                                 |
| 20                       | 0.380                  | 60.23   | 1.814                  | 39.77   | 0.950                                 | 0.552                  | 53.57   | 2.217                  | 46.43   | 1.325                                 |
| 40                       | 0.398                  | 59.05   | 1.933                  | 40.95   | 1.027                                 | 0.524                  | 46.61   | 2.094                  | 53.39   | 1.362                                 |
| 60                       | 0.432                  | 57.16   | 1.895                  | 42.84   | 1.059                                 | 0.585                  | 51.44   | 2.230                  | 48.56   | 1.384                                 |
| 80                       | 0.447                  | 53.95   | 1.971                  | 46.05   | 1.149                                 | 0.665                  | 52.58   | 2.485                  | 47.42   | 1.528                                 |
| 100                      | 0.445                  | 53.06   | 1.982                  | 46.94   | 1.166                                 | 0.687                  | 52.14   | 2.475                  | 47.86   | 1.543                                 |

## Reference

S1 J. Liu, X. X. Yuan, H. W. Li and Y. Q. Wu, *J. Mater. Chem. C*, 2017, **5**, 9979-9985.
